# Supplementary material for: Stability of intramolecular quadruplexes: sequence effects in the central loop
Source: PubMed Central journal article supplement — Nucleic Acids Res. 2009 Jul 6;37(16):5559–67. doi: 10.1093/nar/gkp563 (PMC2760802; doi:10.1093/nar/gkp563), 2009-07-06
Supplement: gkp563_1.pdf [file gkp563_1.pdf]

## Stability of intramolecular quadruplexes: sequence effects in the central loop

Aurore Guédin, Patrizia Alberti & Jean-Louis Mergny

### Supplementary information:

#### ***Figure S1: Example of raw melting profiles.***

A & B) Absorbance at 295 nm vs temperature in sodium (A) and potassium (B). Baselines chosen for  $T_m$  determination and van't Hoff analysis are also shown.

C & D) Van't Hoff analysis of the corresponding data in sodium (C) and potassium (D).

#### ***Figure S2: Non denaturing gel electrophoresis of all 36 sequences analyzed by UV-shadow (in sodium).***

Each strand was incubated at a strand concentration of 30  $\mu$ M in a 100 mM NaCl 10 mM Tris/HCl pH 7.5 buffer. The gel was prepared at 15% acrylamide supplemented with 20mM of NaCl and run at 20°C. Size markers are present on the left (the 3 intense blurry bands correspond to the dyes used to monitor migration).

#### ***Figure S3: Effects of various parameters on $T_m$ .***

Results are shown for sodium (blue) or potassium (red) conditions. Error bars correspond to S.D.

#### ***Figure S4: Effects of various parameters on $\Delta G^\circ$ .***

Results are shown for sodium (blue) or potassium (red) conditions. Error bars correspond to S.D.

#### ***Figure S5: DSC data.***

Raw profiles are shown for the 3 sequences in sodium (left) or potassium (right).

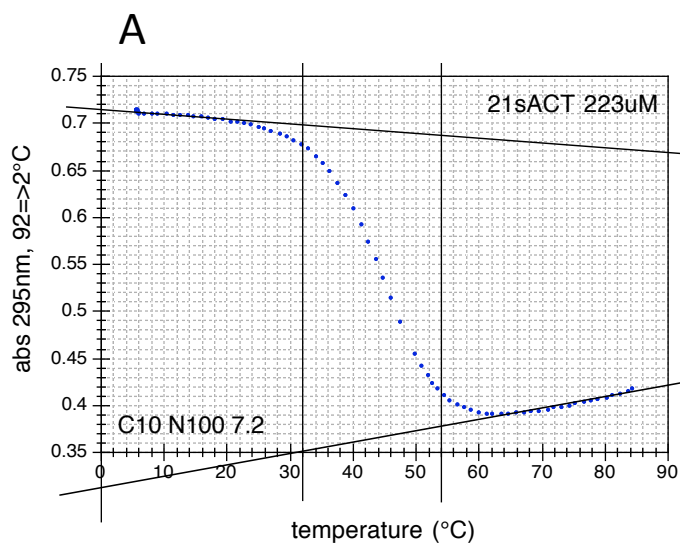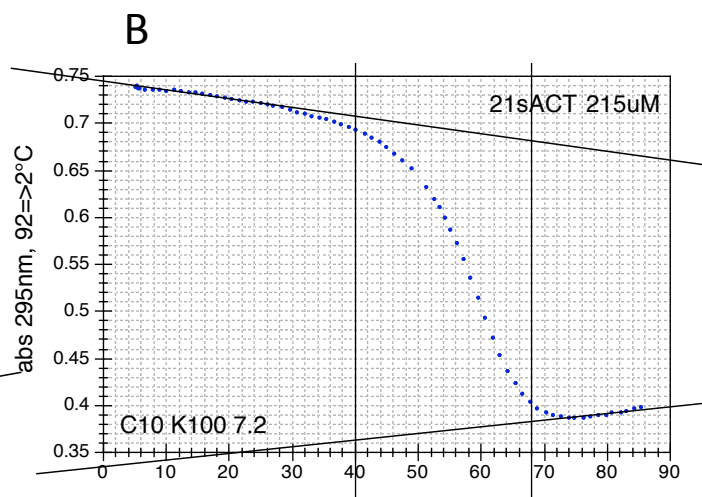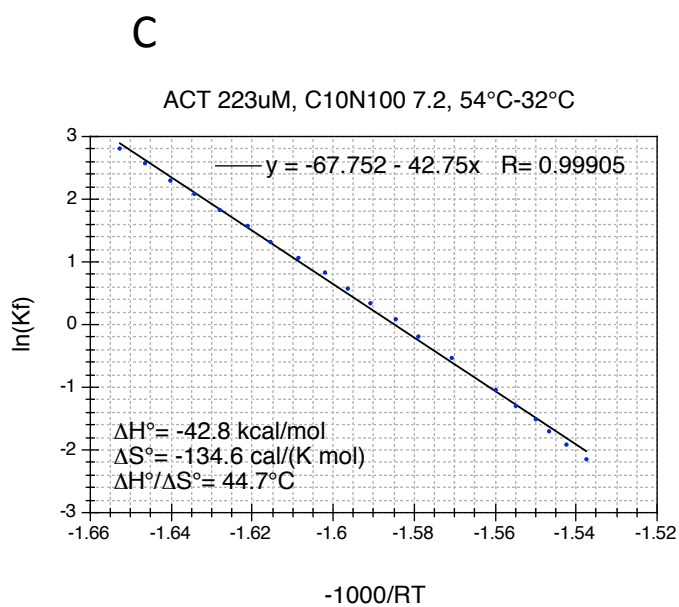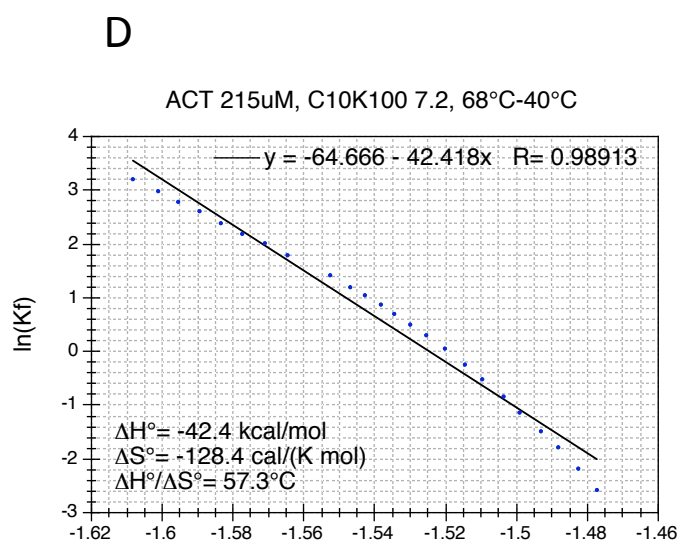

Figure S1

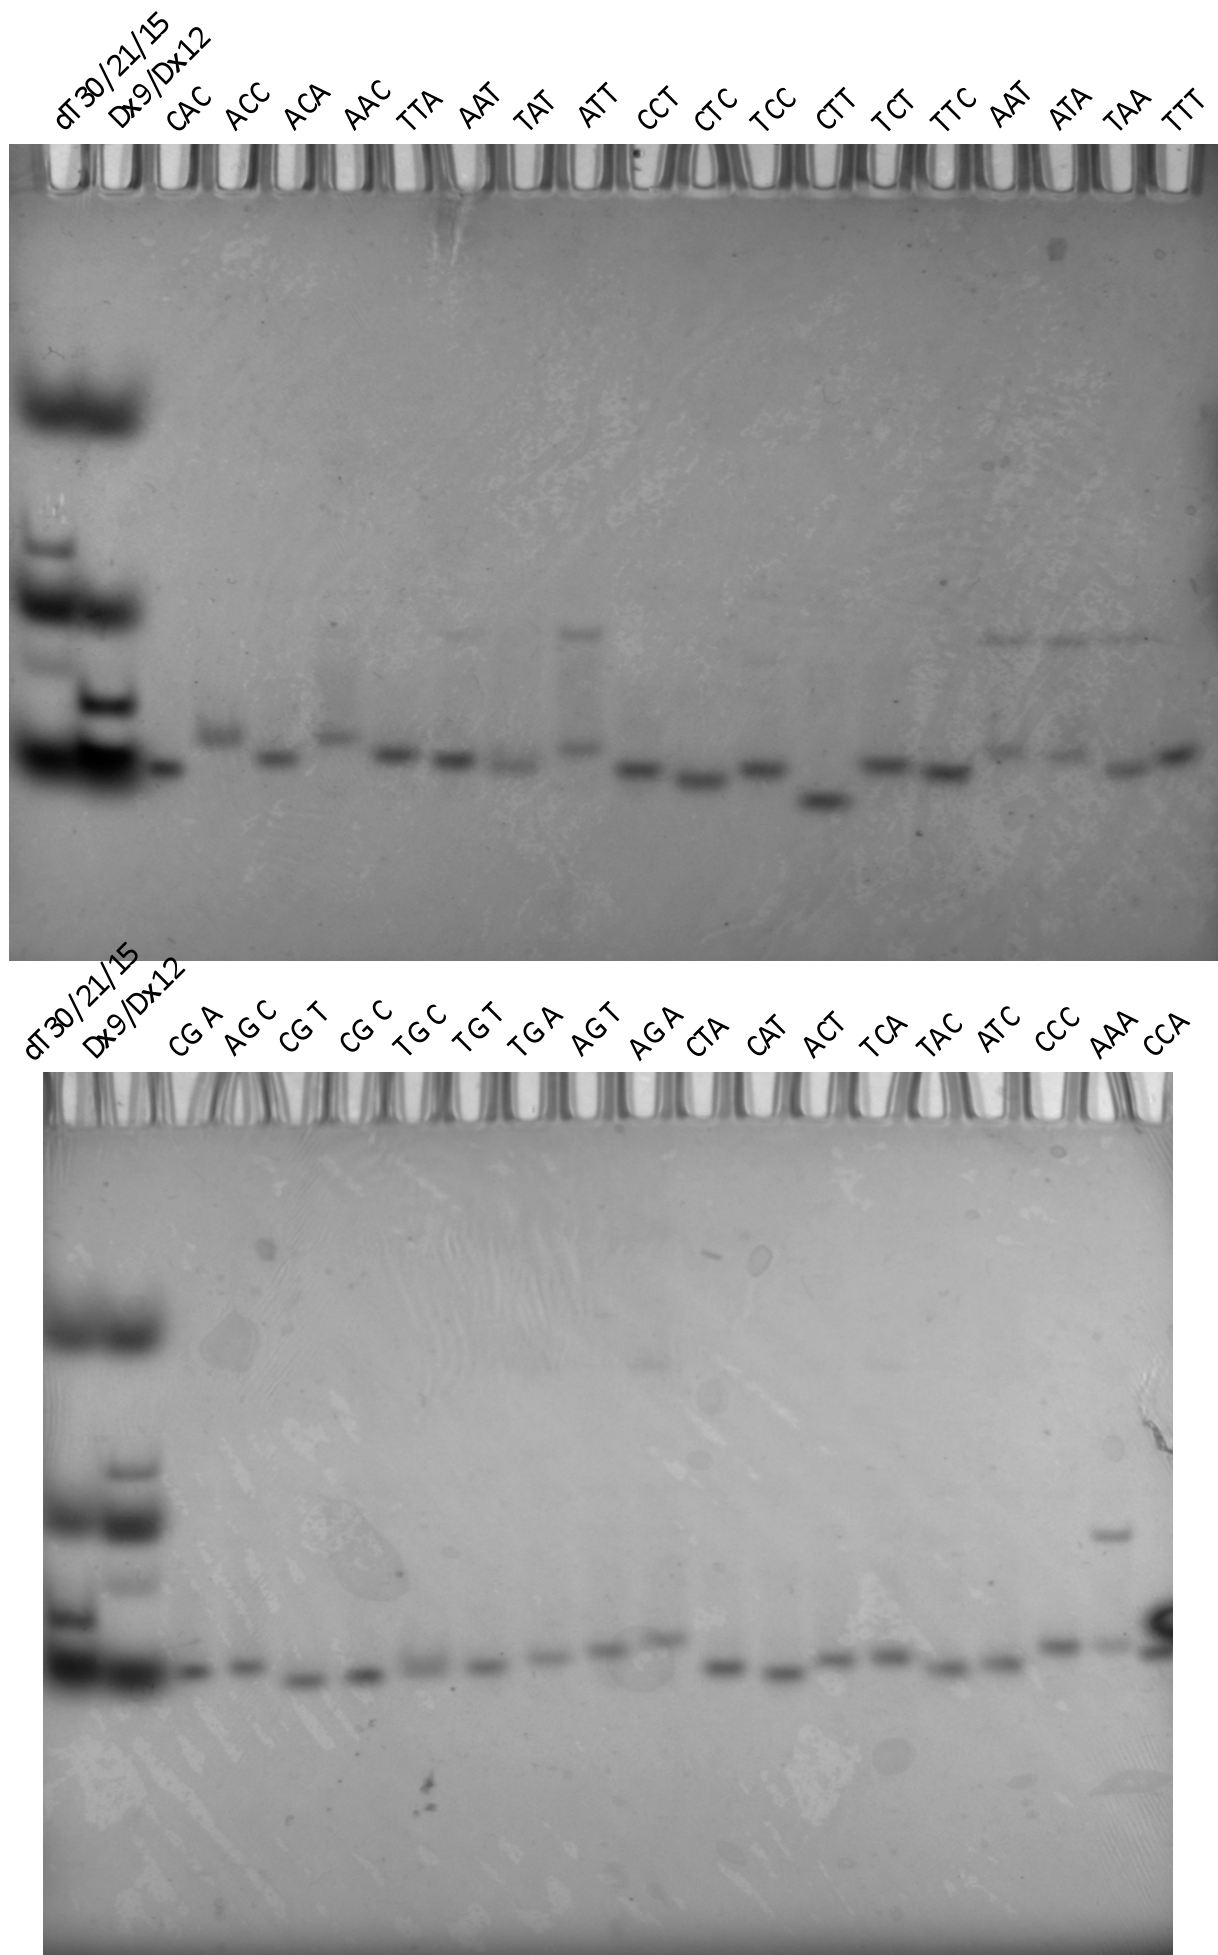

Figure S2

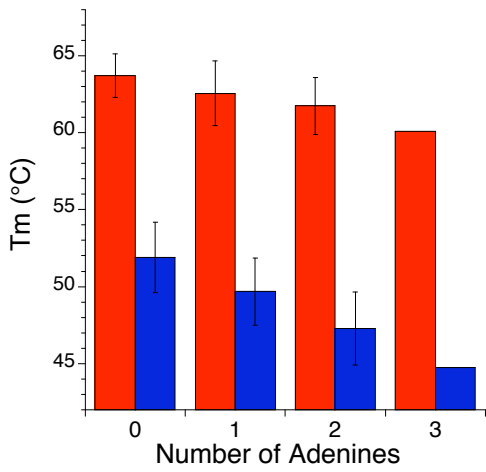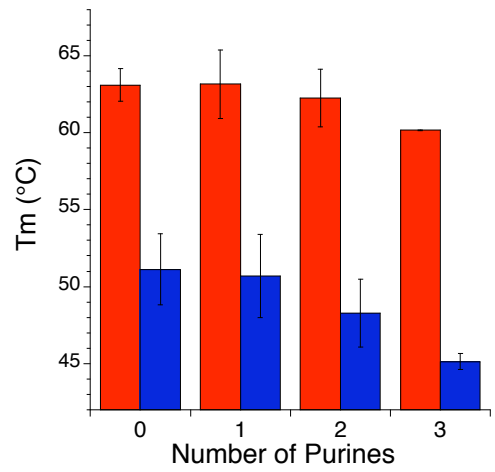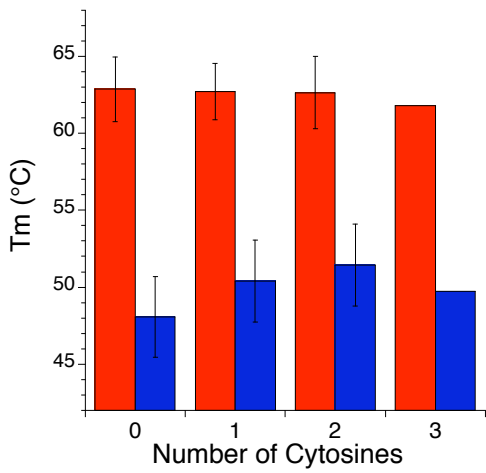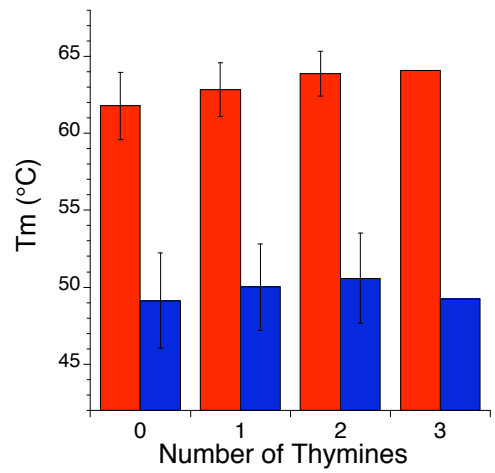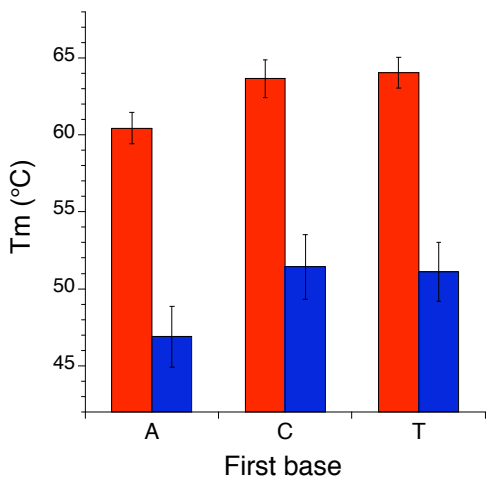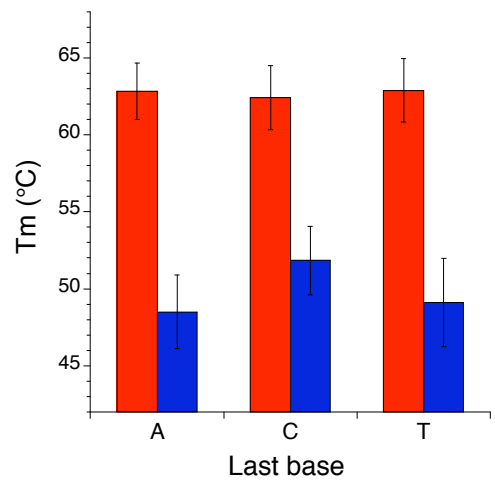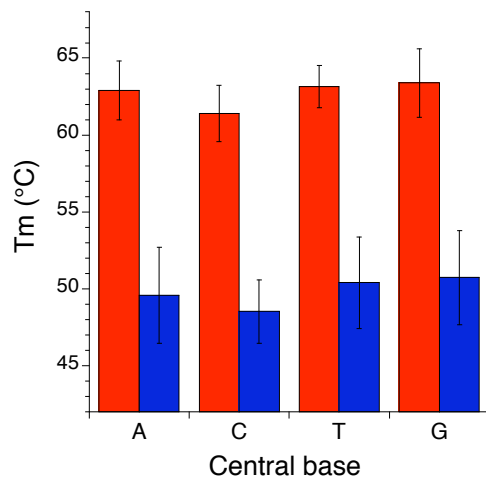

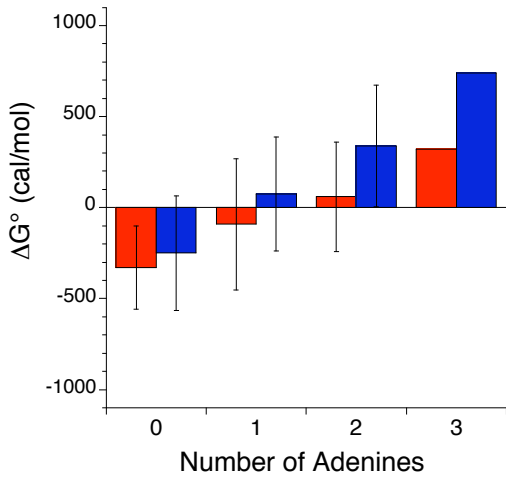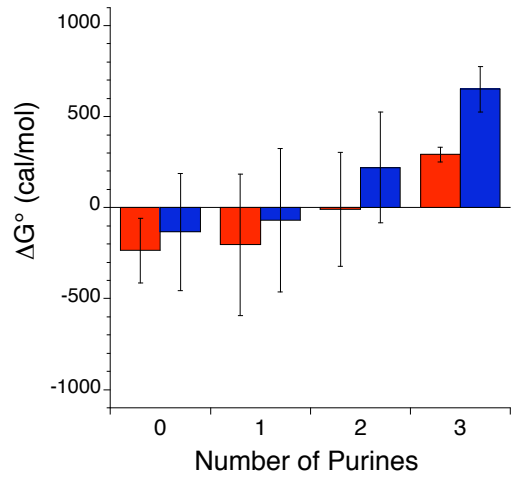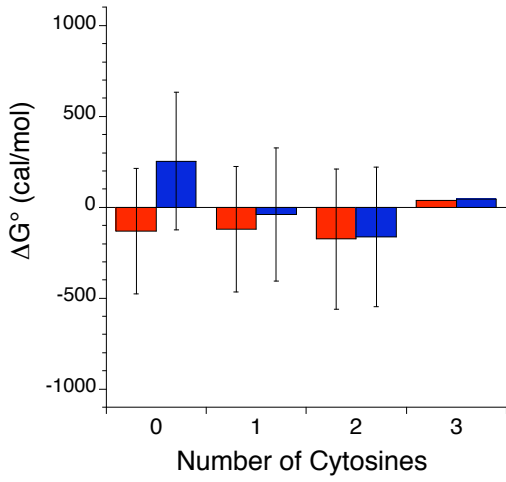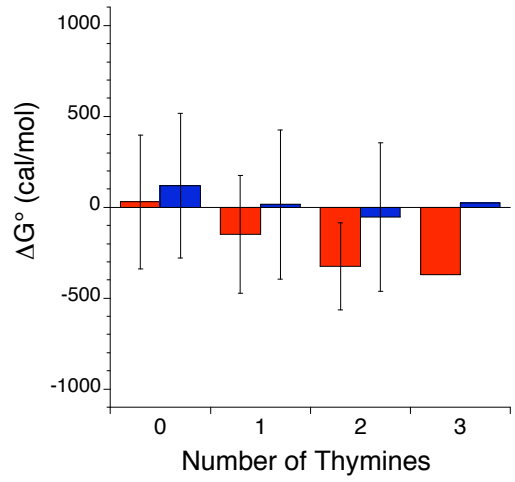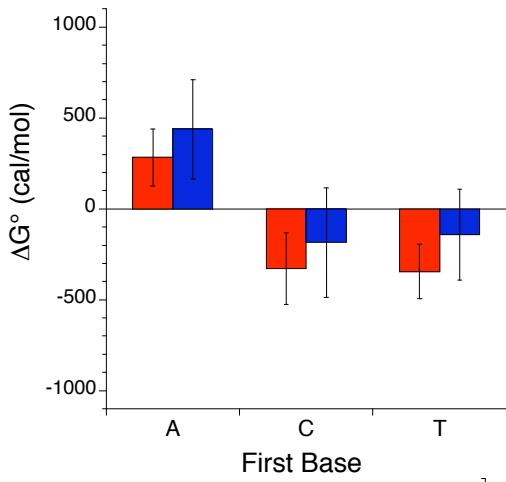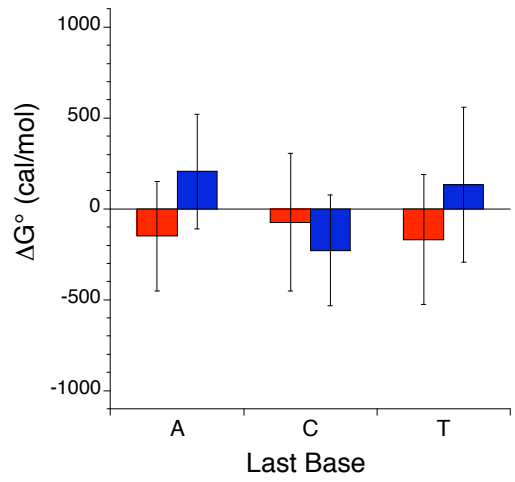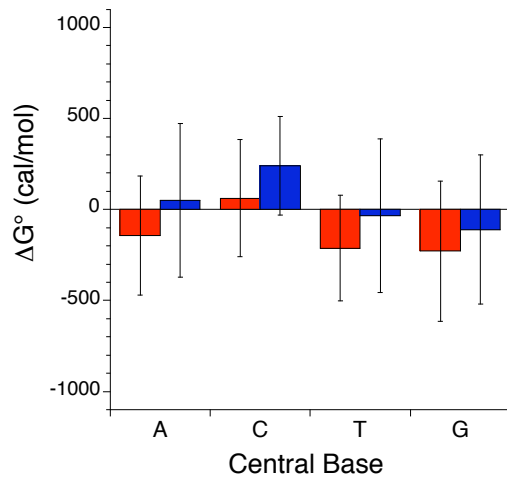

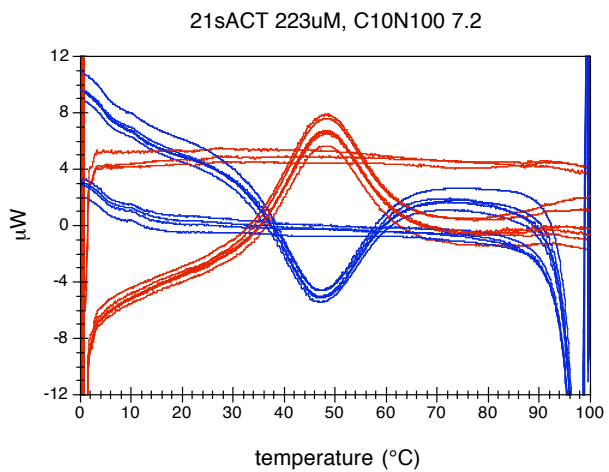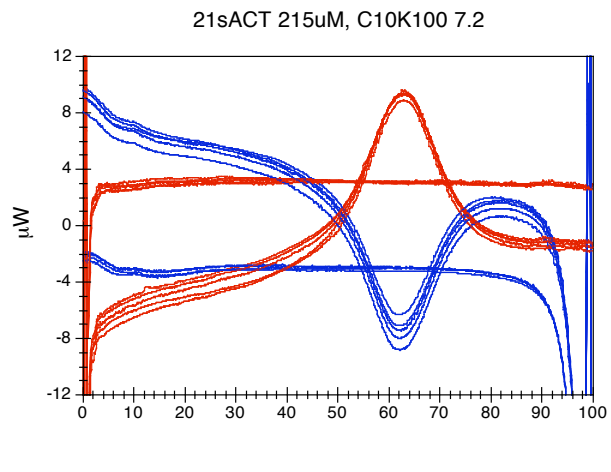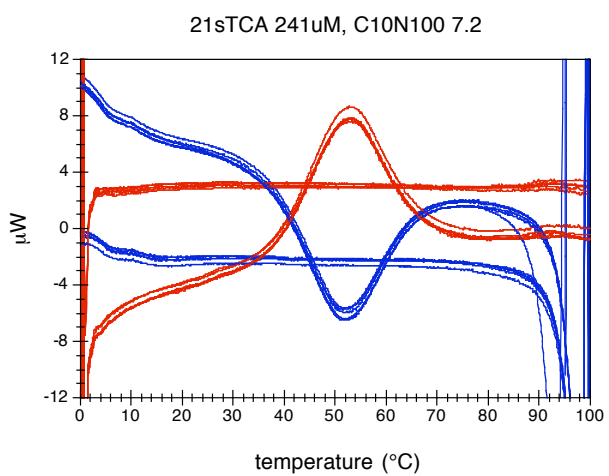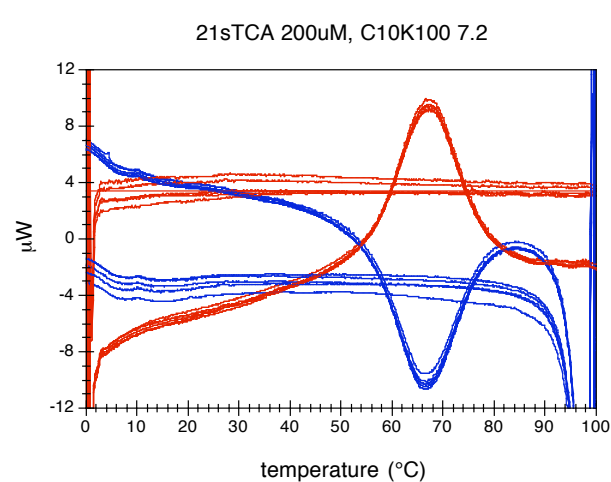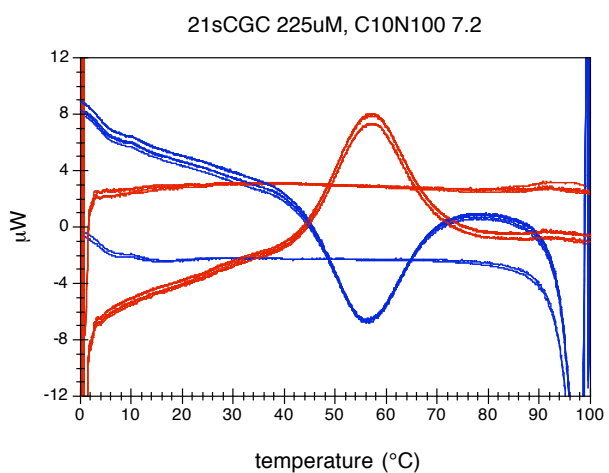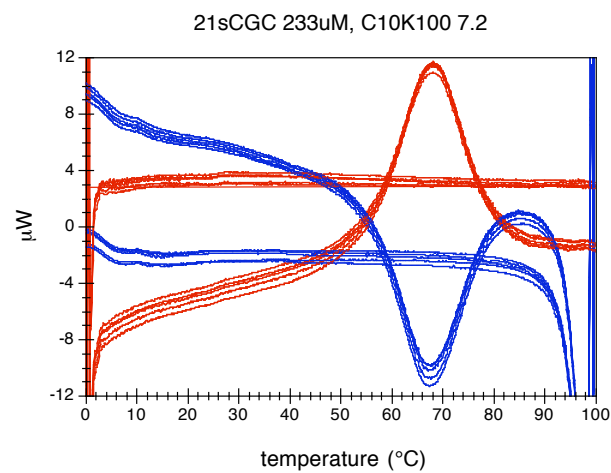

Figure S5
